# Supplementary material
Source: PubMed Central journal article supplement (PMC4789962)

## Appendix A

Collected delirium predictors within 24 hours after intensive care admission

| Variable                                         | Category | Description                                                                                                                                                                                  |
|--------------------------------------------------|----------|----------------------------------------------------------------------------------------------------------------------------------------------------------------------------------------------|
| Age (years)*                                     | C        | Continuous variable                                                                                                                                                                          |
| Alcohol abuse*                                   | D        | Known medical history of alcohol abuse                                                                                                                                                       |
| Anaemia (L/L)*                                   | C        | Continuous variable of hematocrit, lowest value                                                                                                                                              |
| APACHE-II score (per point)*                     | C        | Calculated 24 hours after ICU admission                                                                                                                                                      |
| Coma*                                            | Cat      | No coma: RASS-4/-5 maximum 8 hours<br>RASS-4/-5 for longer than 8 hours:<br>1. With use of medication<br>2. Other (i.e. intra cerebral bleeding, post-resuscitation)<br>3. Combination (1+2) |
| Dementia*                                        | D        | Known medical history of dementia                                                                                                                                                            |
| Admission category#                              | Cat      | 1. Surgical<br>2. Medical<br>3. Trauma<br>4. Neurology/neurosurgical                                                                                                                         |
| Dopamine use*                                    | D        | Any use of dopamine                                                                                                                                                                          |
| Elevated hepatic enzymes (ASAT and ALAT in U/L)* | C        | Level of alanine aminotransferase (ALAT) and aspartate aminotransferase (ASAT), highest absolute value                                                                                       |
| Epidural catheter*                               | D        | Any use of an epidural catheter                                                                                                                                                              |
| Fever (in C°)*                                   | C        | Continuous variable, highest absolute value                                                                                                                                                  |
| Hyperamylasemia (U/L)*                           | C        | Continuous variable, highest absolute value                                                                                                                                                  |
| Hyperbilirubinemia (umol/L)*                     | C        | Continuous variable, highest absolute value                                                                                                                                                  |
| Hypertension*                                    | B        | Medical history of hypertension                                                                                                                                                              |
| Hypocalcaemia (mmol/L)*                          | C        | Continuous variable, lowest absolute value                                                                                                                                                   |
| Hyponatraemia (mmol/L)*                          | C        | Continuous variable, lowest absolute value                                                                                                                                                   |
| Hypotension*                                     | B        | Symptomatic, resulting in treatment, or systolic blood pressure < 80 mmHg                                                                                                                    |
| Infection*                                       | D        | Proven or strong suspicion of infection for which antibiotics were started                                                                                                                   |
| Lorazepam use*                                   | D        | Any use of lorazepam (oral or parenteral)                                                                                                                                                    |
| Metabolic acidosis*                              | B        | pH <7.35 with bicarbonate <24mmol/L                                                                                                                                                          |
| Morphine use*                                    | Cat      | No morphine: no use of any morphine<br>Cumulative use of any form of morphine:<br>1. 0.01-7.1mg<br>2. 7.2-18.6mg<br>3. 18.7-331.6mg                                                          |
| Respiratory disease*                             | D        | Chronic obstructive pulmonary disease, cor pulmonale, pneumothorax, hemothorax, thorax trauma                                                                                                |
| Sedative use*                                    | D        | Any use of propofol, midazolam, lorazepam or combination                                                                                                                                     |
| Urgent admission#                                | D        | Unplanned intensive care admission                                                                                                                                                           |
| Urea (mmol/L)*                                   | C        | Continuous variable, highest value in blood                                                                                                                                                  |

C= continuously B=binary D=dichotomized Cat.=categorical

Risk factors based on systematic review\* or potential risk factors derived from Dutch National Intensive Care Evaluation database #

## Appendix B

Prevalence rate of risk factors and delirium incidence rates in these groups

| Dichotomized variables     | Percentage patients<br>in development<br>cohort<br>(N=1613) | Delirium incidence<br>rate in the specific<br>group |
|----------------------------|-------------------------------------------------------------|-----------------------------------------------------|
| Alcohol abuse              | 3.3% (53)                                                   | 60.4% (32/53)**                                     |
| Coma                       | 20% (323)                                                   | 69% (223/323)**                                     |
| 1. Medication              | 78.6% (253/323)                                             | 62.8% (159/253)                                     |
| 2. Miscellaneous           | 6.5% (21/323)                                               | 85.7% (18/21)                                       |
| 3. Combination             | 15.2% (49/323)                                              | 93.9% (46/49)                                       |
| Dementia                   | 0.5% (8)                                                    | 87.5% (7/8)**                                       |
| Admission category:        |                                                             |                                                     |
| 1. Surgical                | 62.6% (1010)                                                | 15% (152/1010)                                      |
| 2. Medical                 | 22.3% (360)                                                 | 43.1% (155/360)**                                   |
| 3. Trauma                  | 5% (80)                                                     | 47.5% (38/80)**                                     |
| 4. Neurology/neurosurgical | 10.1% (163)                                                 | 40% (66/163)**                                      |
| Dopamine use               | 0.2% (3)                                                    | 0% (0/3)                                            |
| Epidural catheter          | 5.1% (83)                                                   | 0.6% (9/83)                                         |
| Hypertension               | 30.6% (494)                                                 | 26.3% (130/494)                                     |
| Infection                  | 14.9% (241)                                                 | 58.1% (140/241)**                                   |
| Lorazepam use              | 0.6% (9)                                                    | 33.3% (3/9)                                         |
| Metabolic acidosis         | 18.2% (294)                                                 | 58.8% (173/294)**                                   |
| Morphine use:              | 54.8% (884)                                                 | 19.7% (174/884)                                     |
| 1. 0.01-7.1mg/24hrs        | 8.5% (75)                                                   | 1.6% (14/884)                                       |
| 2. 7.2-18.6mg/24hrs        | 63.1% (558)                                                 | 8.1% (72/884)                                       |
| 3. 18.7-331.6mg/24hrs      | 28.4% (251)                                                 | 10% (88/884)                                        |
| Respiratory disease        | 31.5% (508)                                                 | 37.8% (192/508)                                     |
| Sedative use               | 23.9% (386)                                                 | 62.4% (241/386)**                                   |
| Urgent admission           | 52.8% (852)                                                 | 38.3% (326/852)**                                   |

\*\* Delirium incidence rate for the variable was >50% higher than the incidence rate of the total group (=25.5%)

## Appendix C

Prevalence of the PRE-DELIRIC risk factors in each cohort

| <b>Risk variable</b>          | <b>Development<br/>study<br/>(N=1613)</b> | <b>Temporal<br/>validation<br/>study<br/>(N=549)</b> | <b>External<br/>validation<br/>study<br/>(N=894)</b> |
|-------------------------------|-------------------------------------------|------------------------------------------------------|------------------------------------------------------|
| Age mean in y (SD)            | 62 ( $\pm$ 15)                            | 62 ( $\pm$ 15)                                       | 65 ( $\pm$ 14)                                       |
| APACHE-II score (SD)          | 15 ( $\pm$ 6)                             | 15 ( $\pm$ 6)                                        | 18 ( $\pm$ 7)                                        |
| Coma (%)                      |                                           |                                                      |                                                      |
| 1. Medication induced         | 253 (15.7)                                | 82 (14.9)                                            | 273 (30.5)                                           |
| 2. Miscellaneous              | 21 (1.3)                                  | 7 (1.3)                                              | 8 (0.9)                                              |
| 3. Combination                | 49 (3.0)                                  | 40 (7.3)                                             | 58 (6.5)                                             |
| Admission category (%)        |                                           |                                                      |                                                      |
| 1. Surgery                    | 1010 (62.6)                               | 340 (61.9)                                           | 507 (57.0)                                           |
| 2. Medical                    | 360 (22.3)                                | 123 (22.4)                                           | 297 (33.2)                                           |
| 3. Trauma                     | 80 (5)                                    | 18 (3.3)                                             | 30 (3.4)                                             |
| 4. Neurology/<br>neurosurgery | 163 (10.1)                                | 68 (12.4)                                            | 60 (6.7)                                             |
| Infection (%)                 | 241 (14.9)                                | 70 (12.8)                                            | 245 (27.4)                                           |
| Metabolic acidosis (%)        | 294 (18.2)                                | 84 (15.3)                                            | 220 (24.6)                                           |
| Morphine use                  |                                           |                                                      |                                                      |
| 1. 0.01-7.1mg/day             | 75 (4.6)                                  | 143 (26.0)                                           | 44 (4.9)                                             |
| 2. 7.2-18.6mg/day             | 558 (34.6)                                | 147 (26.8)                                           | 24 (2.7)                                             |
| 3. >18.6mg/day                | 251 (15.6)                                | 11 (2.0)                                             | 291 (32.6)                                           |
| Sedation (%)                  | 386 (23.9)                                | 184 (33.5)                                           | 543 (60.7)                                           |
| Urea (mmol/L) median [IQR]    | 7.0 [5.0-9.0]                             | 7.6 [5.7-10.2]                                       | 7.5 [5.5-11.2]                                       |
| Urgent admission (%)          | 852 (52.8)                                | 232 (42.3)                                           | 495 (55.4)                                           |

Data are presented as mean (SD), unless mentioned otherwise

## Appendix D

Figure A: Calibration plot of the development model

Figure B: Calibration plot of the temporal validation model

Figure C: Calibration plot of the external validation model

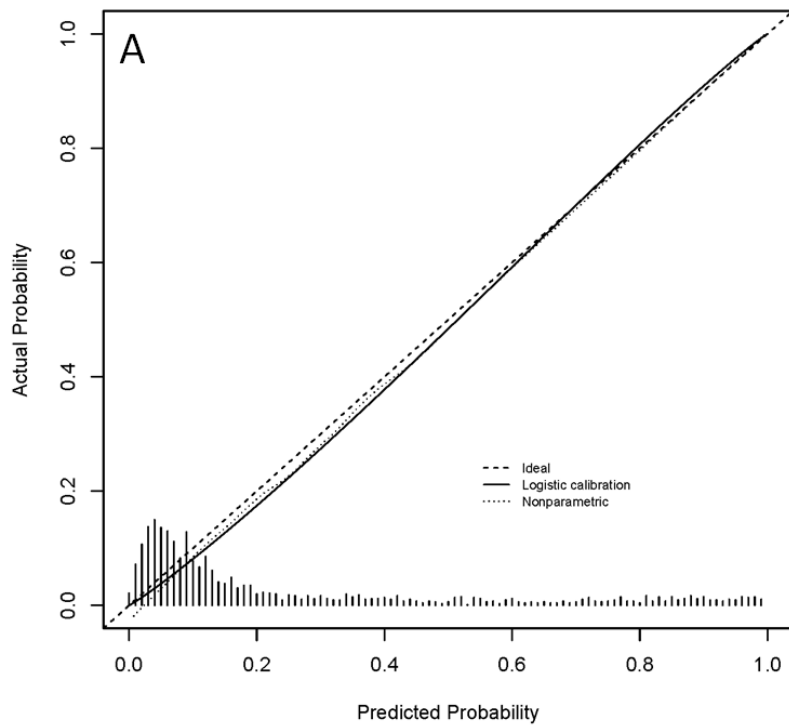

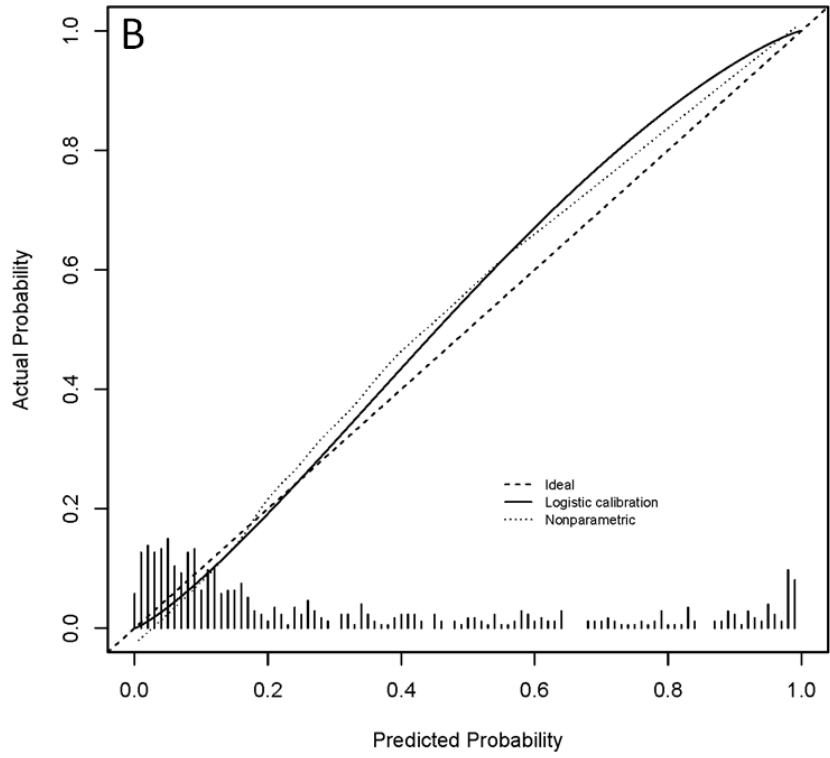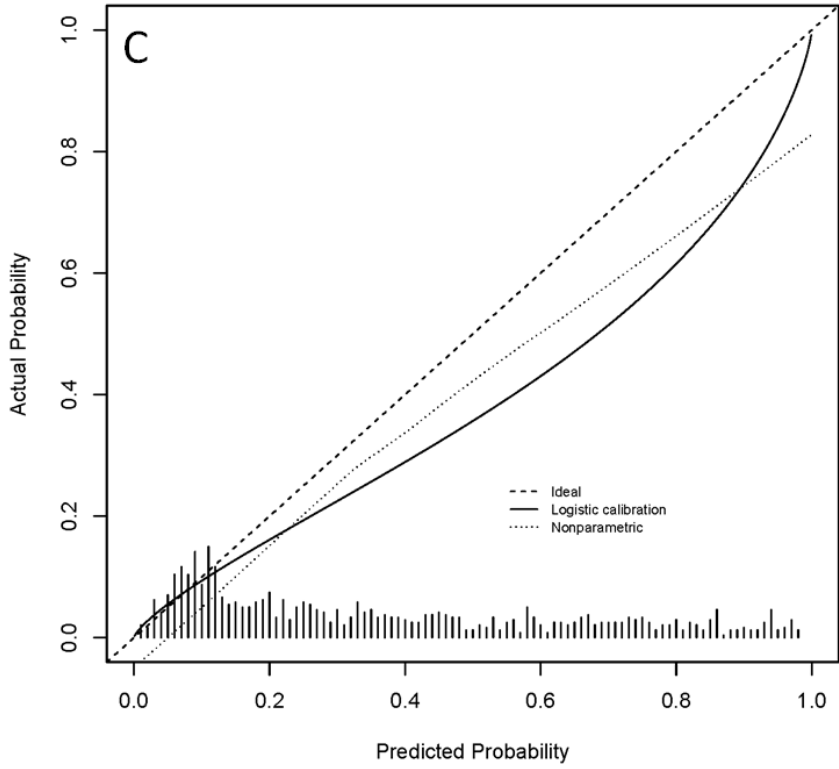

Supplement: vanm834275.ww1_default.pdf [file vanm834275.ww1_default.pdf]
